# Supplementary material for: High energy storage density with high power density in Bi0.2Sr0.7TiO3/BiFeO3multilayer thin films
Source: Royal Society of Chemistry journal article supplement (doi:10.1039/d0tc05646d), 2021-01-01
Supplement: d0tc05646d1.pdf [file d0tc05646d1.pdf]

**Supporting Information**

**High energy storage density with high power density in  $\text{Bi}_{0.2}\text{Sr}_{0.7}\text{TiO}_3/\text{BiFeO}_3$**

**multilayer thin films**

*Baijie Song, Kun Zhu, Hao Yan, Liuxue Xu, Bo Shen, Jiwei Zhai\**

Key Laboratory of Advanced Civil Engineering Materials of Ministry of Education,  
Functional Materials Research Laboratory, School of Materials Science and  
Engineering, Tongji University, Shanghai 201804, China

\*Corresponding author: Jiwei Zhai. E-mail address: [apzhai@tongji.edu.cn](mailto:apzhai@tongji.edu.cn)

1 Power density can be calculated as following equation:  $p_D = \frac{U_{rec}}{2ESRC}$ , where ESR  
 2 means equivalent series resistance, expressed as:  $ESR = \tan\delta \times X_c = \frac{\tan\delta}{2\pi fC}$ . Based on  
 3 above equations, calculated power density of 2BFO reaches up to 2.28 MW cm<sup>-3</sup> at 1  
 4 kHz. Note that calculated  $p_D$  is greatly difference from measured  $p_D$ . It is so strange.  
 5 But  $p_D$  of the same order of magnitude~ 6.47 MW cm<sup>-3</sup> is also obtained in  
 6 BaSn<sub>0.15</sub>Ti<sub>0.85</sub>O<sub>3</sub>/Ba<sub>0.6</sub>Sr<sub>0.4</sub>TiO<sub>3</sub> thin film with  $U_{rec}$ ~43.28 J cm<sup>-3</sup>,  $\tan\delta$ ~0.02 and  $f$ ~1 kHz  
 7 based on above equations<sup>1</sup>. In addition, 0.94(Bi<sub>0.5</sub>Na<sub>0.5</sub>)<sub>0.94</sub>TiO<sub>3</sub>-0.06BaTiO<sub>3</sub>/BiFeO<sub>3</sub>  
 8 multilayer thin film also possesses power density of 47 MW cm<sup>-3</sup> measured by a RLC  
 9 circuit while calculated value of that is only near to 2.01 MW cm<sup>-3</sup> with  $U_{rec}$ ~31.96 J  
 10 cm<sup>-3</sup>,  $\tan\delta$ ~0.05 and  $f$ ~1 kHz<sup>2</sup>. As far as we know,  $U_{rec}$  is obtained via  $P$ - $E$  loops under  
 11 AC while measured  $p_D$  is based on current magnitude under DC. The electrode area of  
 12  $P$ - $E$  and charge/discharge measurement is 0.3 mm and 2 mm. Voltage source type and  
 13 electrode area may lead to the divergence.  
 14

1

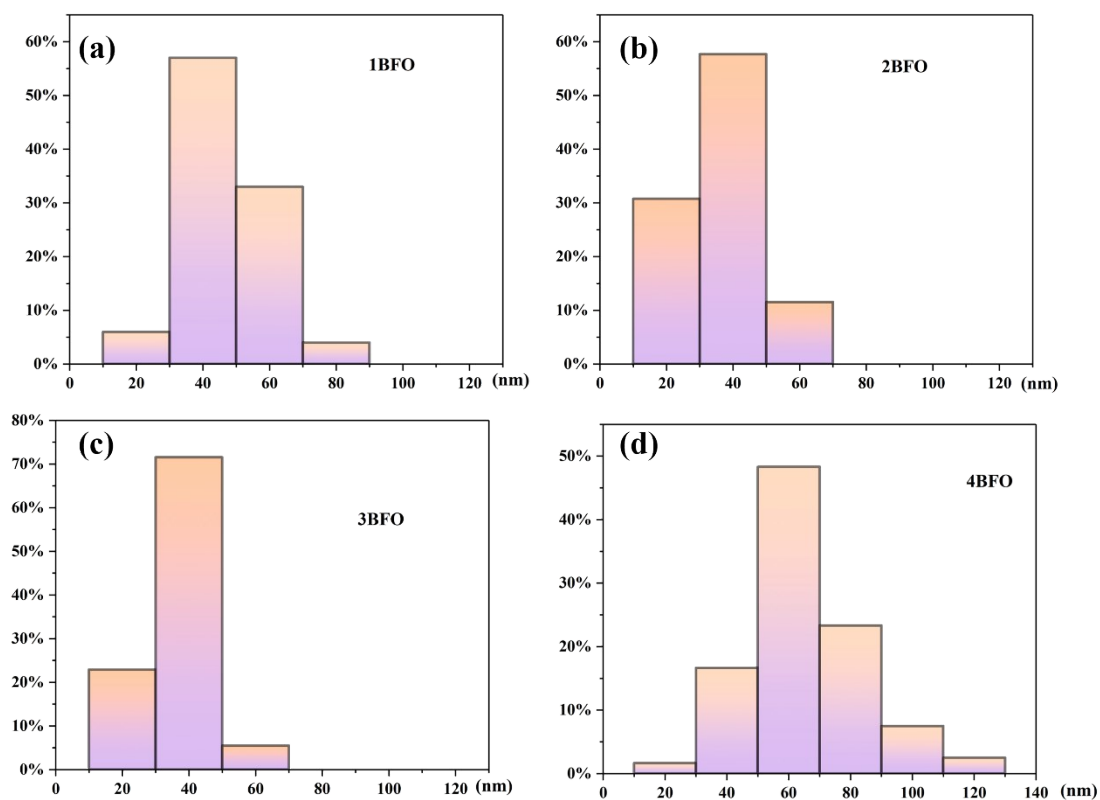

2

3 **Figure. S1.** Particle size distribution of (a) 1BFO, (b) 2 BFO, (c) 3 BFO and (d) 4BFO

4 thin film.

5

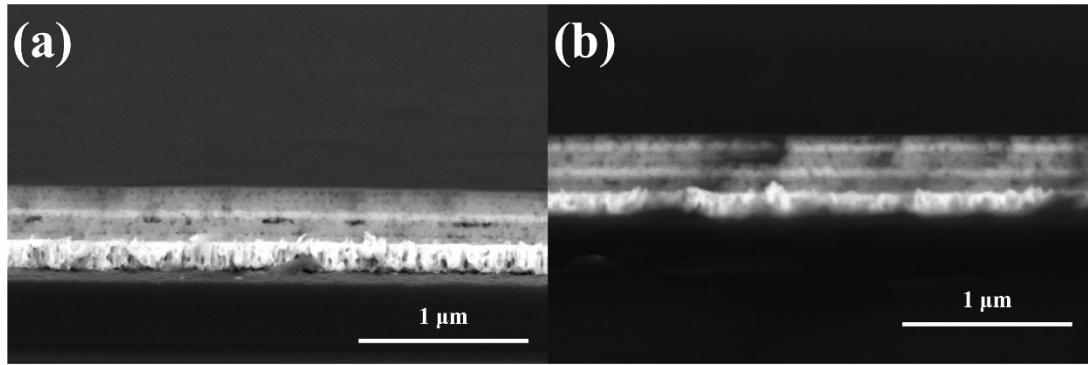

1

2 **Figure. S2.** The cross-sectional micrograph of (a) 1BFO and (b) 2BFO thin film.

3

1

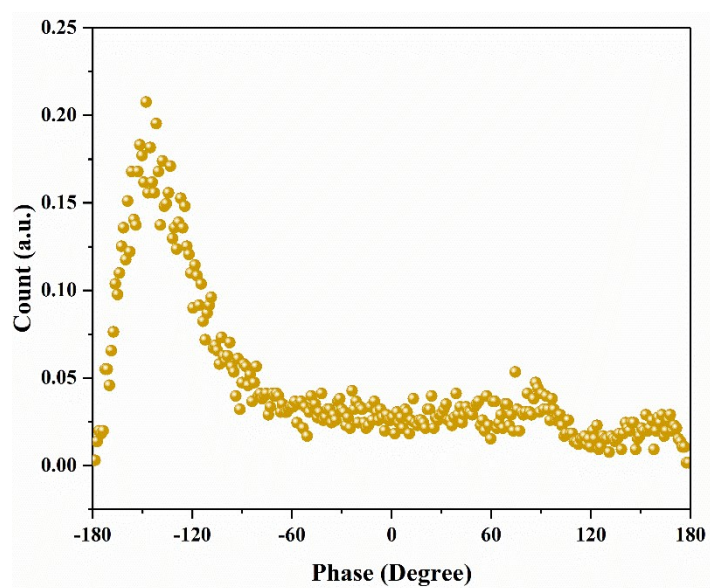

**Figure. S3.** PFM phase plot of 1BFO thin film.

2

3

4

1  
2

**Table. S1.** The roughness of *x*BFO thin films.

| <b>BFO layer</b> | <b>Rq (nm)</b> | <b>Ra (nm)</b> |
|------------------|----------------|----------------|
| <b>1</b>         | <b>0.841</b>   | <b>0.683</b>   |
| <b>2</b>         | <b>1.120</b>   | <b>0.861</b>   |
| <b>3</b>         | <b>1.260</b>   | <b>0.907</b>   |
| <b>4</b>         | <b>2.010</b>   | <b>1.630</b>   |

3  
4  
5  
6  
7  
8  
9

1 S. Yu, C. Zhang, M. Wu, H. Dong and L. Li, *Journal of Power Sources*, 2019, **412**, 648-654.  
2 P. Chen, S. Wu, P. Li, J. Zhai and B. Shen, *Inorganic Chemistry Frontiers*, 2018, **5**, 2300-  
2305.
